# Supplementary material for: Diet Diversity and Micronutrient Adequacy among Filipino School-Age Children
Source: PubMed Central journal article supplement (PMC6770711; doi:10.3390/nu11092197), 2019-09-12

## Supplementary Materials

Figure S1. Distribution of percentage of children per wealth status group according to dwelling locations.

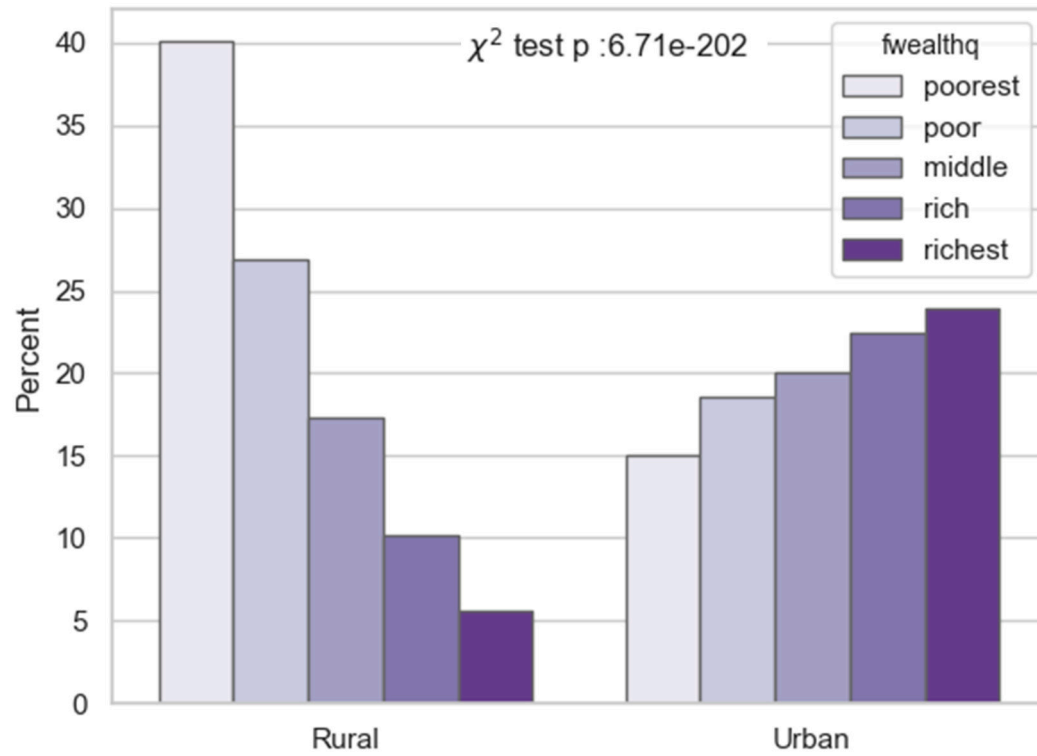

Supplement: nutrients-11-02197-s001.pdf [file nutrients-11-02197-s001.pdf]
